# Supplementary material for: Molecular Characterization of Extended-Spectrum β-Lactamase–Producing Escherichia coli and Klebsiella pneumoniae Among the Pediatric Population in Qatar
Source: Front Microbiol. 2020 Nov 11;11:581711. doi: 10.3389/fmicb.2020.581711 (PMC7686840; doi:10.3389/fmicb.2020.581711)
Supplement: Supplementary file 2 [file Table_1.XLSX]

## Sheet: Sheet1
																					ESBLs				IRT	TEM & SHV beta-lactamases				OXA	AmpC	CARBA		PMQR													Aminoglycoside modifying enzymes
ID		Date	Specimen	UNIT	ST	fimH	CRO	CAZ	FEP	AMC	TZP	AZT	ETP	MEM	GEN	AMK	CIP	LVX	SXT	NIT	CTX-M ESBL	CTX-M ESBL	TEM-ESBL	SHV-ESBL	IRT	Narrow TEM	?TEM	Narrow SHV	?SHV	Narrow OXA	bla AmpC	bla CARBA	OTHER	aac(6)-Ib-cr	OqxA	OqxB	Qep	qnr	qnr	GyrA	GyrA	ParC	ParC	ParC	ParE	ParE	AAC	AAC	AAD
E15	ECOLI	2018-01-30	Urine	GPED	131	H41	R	I	R	S	S	R	S	S	S	S	I	S	R	S	CTX-M-15																			S83L		S80I	E84V			I529L			aadA5
E17	ECOLI	2018-02-13	Rectal swab	GPED	58		R	I	R	S	S	R	S	S	S	S	S	S	R	S	CTX-M-55
E19	ECOLI	2018-02-22	Rectal swab	GPED	73		R	S	S	S	S	S	S	S	S	S	S	S	S	S	CTX-M-15					TEM-1D														S83L
E20	ECOLI	2018-02-26	Rectal swab	NICU	278		R	R	I	S	S	R	S	S	S	S	S	S	R	S	CTX-M-15
E14	ECOLI	2018-03-01	Rectal swab	GPED	10995		R	S	S	S	S	S	S	S	S	S	S	S	S	S	CTX-M-15																	qnrS1
E21	ECOLI	2018-03-04	Rectal swab	GPED	2141		R	R	R	S	S	R	S	S	S	S	S	S	R	I	CTX-M-15																			S83L
E22	ECOLI	2018-03-04	Urine	GPED	131	H41	R	R	R	S	S	R	S	S	S	S	R	R	R	S	CTX-M-102																			S83L	D87N	S80I							aadA5
E7	KPNEU	2018-03-04	Urine	GPED	268		R	R	R	S	S	R	S	S	S	S	S	S	R	S	CTX-M-15							SHV-11							oqxA8	oqxB10		qnrS1											aadA2
E8	ECOLI	2018-03-05	Sputum	GPED	361		R	R	R	R	R	R	S	S	R	S	R	R	R	S	CTX-M-15					TEM-1B												qnrS1		S83L	D87N	S80I	E84V				aac(3)-IVa		aadA22
E10	ECOLI	2018-03-15	Rectal swab	GPED	9269		R	I	I	S	S	R	S	S	S	S	S	S	R	S	CTX-M-15					TEM-1B												qnrS1	qnrB7										aadA5
E12	ECOLI	2018-03-22	Urine	PICU	127		R	R	R	S	S	R	S	S	R	S	S	S	R	S	CTX-M-15					TEM-1B																					aac(3)-IId		aadA5
E6	ECOLI	2018-03-22	Rectal swab	GPED	421		R	I	R	R	S	R	S	S	S	S	R	R	S	S	CTX-M-15																			S83L
E13	ECOLI	2018-03-25	Abscess fluid	GPED	10		R	S	S	S	S	S	S	S	S	S	S	S	R	S	CTX-M-15					TEM-1B												qnrS1											aadA5
E24	ECOLI	2018-03-31	Rectal swab	PICU	10997		R	R	S	R	R	R	S	S	S	S	S	S	S	S	CTX-M-15					TEM-1B												qnrS1		S83L	D87N	S80I			S458A
E25	ECOLI	2018-03-31	Rectal swab	PICU	131	H41	R	R	R	S	S	R	S	S	S	S	S	S	R	S	CTX-M-15					TEM-1B														S83L									aadA5
E26	ECOLI	2018-03-31	Rectal swab	GPED	3268		R	R	R	I	S	R	S	S	S	S	S	S	S	S	CTX-M-15					TEM-1B												qnrS1
E32	KPNEU	2018-04-13	Rectal swab	NICU	48		R	I	R	S	S	R	S	S	S	S	S	S	S	S	CTX-M-15							SHV-11							oqxA6	oqxB10				S83Y
E34	ECOLI	2018-04-13	Rectal swab	GPED	2076		R	R	R	S	S	R	S	S	S	S	S	S	S	S	CTX-M-15																			S83L
E35	ECOLI	2018-04-14	Urine	PICU	1193		R	R	R	S	S	R	S	S	S	S	R	R	S	S	CTX-M-15					TEM-1B														S83L	D87N	S80I				L416F
E36	ECOLI	2018-04-14	Rectal swab	PICU	131	H30	R	S	I	S	S	I	S	S	S	S	R	R	S	S	CTX-M-27																			S83L	D87N	S80I	E84V			I529L
E37	KPNEU	2018-04-14	Rectal swab	GPED	889		R	R	R	I	S	R	S	S	S	S	I	S	R	S	CTX-M-15					TEM-1B			SHV-108	OXA-1				aac(6')-Ib-cr_1	oqxA6	oqxB20		qnrS1											aadA2
E39	ECOLI	2018-04-15	Rectal swab	GPED	10		R	R	R	S	S	R	S	S	S	S	S	S	R	S	CTX-M-15					TEM-1B												qnrS1
E40	ECOLI	2018-04-15	Rectal swab	GPED	162		R	S	R	S	S	S	S	S	S	S	S	S	R	S	CTX-M-15					TEM-1B												qnrS1
E41	ECOLI	2018-04-29	Blood	GPED	38		R	I	R	I	S	R	S	S	S	S	S	S	R	S	CTX-M-14B					TEM-1B																							aadA1
E42	ECOLI	2018-05-02	Urine	GPED	141		R	S	R	S	S	I	S	S	S	S	S	S	S	S	CTX-M-3
E43	ECOLI	2018-05-05	Rectal swab	GPED	10		R	I	R	S	S	R	S	S	S	S	S	S	S	S	CTX-M-15																	qnrS1
CP2	ECOLI	2018-05-06	Rectal swab	GPED	38		R	S	I	R	I	R	R	S	R	S	S	S	R	S	CTX-M-122					TEM-1B						OXA-48								S83L							aac(3)-IId		aadA5
E44	ECOLI	2018-05-06	Rectal swab	GPED	501		R	S	R	S	S	I	S	S	S	S	R	R	R	S	CTX-M-15																			S83L	D87N	S80I	E84G	S57T					aadA5
E46	ECOLI	2018-05-06	Rectal swab	GPED	1193		R	S	R	S	S	R	S	S	R	S	R	R	R	S	CTX-M-15									OXA-1				aac(6')-Ib-cr_1						S83L	D87N	S80I					aac(3)-IIa
E47	ECOLI	2018-05-06	Rectal swab	GPED	120		R	R	R	S	S	R	S	S	S	S	S	S	R	S	CTX-M-15																	qnrS1
E48	ECOLI	2018-05-09	Rectal swab	PICU	442		R	R	R	S	S	R	S	S	S	S	S	S	S	S	CTX-M-15
E49	ECOLI	2018-05-09	Rectal swab	GPED	349		R	I	R	S	S	R	S	S	S	S	S	S	S	S	CTX-M-15
E51	ECOLI	2018-05-11	Rectal swab	GPED	2141		R	R	R	S	S	R	S	S	S	S	S	S	R	S	CTX-M-15																			S83L
E53	ECOLI	2018-05-13	Rectal swab	GPED	5708		R	R	R	S	S	R	S	S	S	S	S	S	R	S	CTX-M-15																	qnrS1											aadA5
E54	ECOLI	2018-05-13	Abscess fluid	GPED	131	H30	R	R	R	I	S	S	S	S	R	S	R	R	S	S	CTX-M-15									OXA-1				aac(6')-Ib-cr_1						S83L	D87N	S80I	E84V			I529L	aac(3)-IIa
E55	ECOLI	2018-05-20	Rectal swab	PICU	131	H41	R	R	R	S	S	R	S	S	R	S	R	R	R	S	CTX-M-15					TEM-1B														S83L	D87N	S80I	E84V			I529L	aac(3)-IId		aadA5
E56	ECOLI	2018-05-20	Rectal swab	PICU	2076		R	S	R	S	S	R	S	S	S	S	S	S	R	S	CTX-M-15					TEM-1B												qnrS1											aadA1
E57	ECOLI	2018-05-20	Rectal swab	PICU	500		R	I	I	I	S	R	S	S	R	S	R	R	R	I	CTX-M-15									OXA-1				aac(6')-Ib-cr_1						S83L	D87N	S80I			I464F		aac(3)-IIa		aadA1
E58	KPNEU	2018-05-21	Rectal swab	PICU	101		R	R	R	S	S	R	S	S	S	S	S	S	S	I	CTX-M-15								SHV-28						oqxA	oqxB		qnrS1
E59	ECOLI	2018-05-23	Rectal swab	PICU	131	H41	R	R	R	S	S	R	S	S	S	S	R	R	R	S	CTX-M-15					TEM-1B														S83L	D87N	S80I	E84V			I529L			aadA5
E60	ECOLI	2018-05-23	Rectal swab	NICU	28		R	R	R	S	S	R	S	S	S	S	R	R	S	S	CTX-M-15																	qnrS1		S83L
E61	ECOLI	2018-05-24	Rectal swab	GPED	1193		R	I	R	S	S	R	S	S	R	S	R	R	R	R	CTX-M-15									OXA-1				aac(6')-Ib-cr_1						S83L	D87N	S80I				L416F	aac(3)-IIa
E62	ECOLI	2018-05-25	Rectal swab	GPED	1312		R	R	R	S	S	R	S	S	S	S	R	R	R	S	CTX-M-15																	qnrS1		S83L
E64	ECOLI	2018-05-25	Rectal swab	PICU	131	H41	R	R	R	S	S	R	S	S	S	S	S	S	R	S	CTX-M-15					TEM-1B														S83L						I529L			aadA5
E67	KPNEU	2018-05-27	Rectal swab	GPED	4977		R	R	R	I	I	S	S	S	R	S	R	S	R	R	CTX-M-15					TEM-1B		SHV-62		OXA-1				aac(6')-Ib-cr_1	oqxA3	oqxB11		qnrB1									aac(3)-IIa
E66	ECOLI	2018-05-29	Rectal swab	GPED	69		R	S	S	S	S	S	S	S	S	S	S	S	R	S	CTX-M-15					TEM-1B
E68	ECOLI	2018-05-30	Respiratory	PICU	648		R	R	R	I	I	R	S	S	S	S	R	R	R	S	CTX-M-15									OXA-1				aac(6')-Ib-cr_1						S83L	D87N	S80I			L458A				aadA5
E70	ECOLI	2018-06-03	Peritoneal fluid	GPED	131	H30	R	S	I	S	S	I	S	S	S	S	R	R	S	S	CTX-M-27																			S83L	D87N	S80I	E84V			I529L
E71	ECOLI	2018-06-03	Ascitic fluid	GPED	550		R	R	R	S	S	R	S	S	S	S	S	S	S	S	CTX-M-15					TEM-1B
E72	ECOLI	2018-06-05	Rectal swab	NICU	68		R	R	R	S	S	R	S	S	S	S	S		S	S	CTX-M-15
E73	ECOLI	2018-06-05	Rectal swab	NICU	68		R	R	R	S	S	R	S	S	S	S	S		S	S	CTX-M-15
E74	KPNEU	2018-06-05	Rectal swab	NICU	515		R	R	R	I	S	R	S	S	S	S	S		R	I	CTX-M-15					TEM-1B			SHV-145						oqxA10	oqxB31
E75	KPNEU	2018-06-05	Rectal swab	NICU	307		R	R	R	I	S	R	S	S	R	S	R		R	S	CTX-M-15			SHV-106		TEM-1B				OXA-1				aac(6')-Ib-cr_1	oqxA5	oqxB19		qnrB1		S83I		80I					aac(3)-IIa
E77	ECOLI	2018-06-05	Rectal swab	PICU	101		R	R	R	S	S	R	S	S	S	S	S		R	S	CTX-M-15																	qnrS1
E78	ECOLI	2018-06-05	Rectal swab	GPED	10		R	S	S	S	S	I	S	S	S	S	S		R	S	CTX-M-15																	qnrS1
CP5	KPNEU	2018-06-14	Rectal swab	GPED	14		R	R	R	R	R	R	R	R	R	S	R	S	R	R	CTX-M-15			SHV-106		TEM-1A				OXA-1; OXA-9		NDM-1			oqxA6	oqxB20		qnrS1	qnrB1								aac(3)-IIa		aadA1
CP4	ECOLI	2018-06-15	Rectal swab	GPED	127		R	R	R	R	R	R	R	R	R	S	R		R	S	CTX-M-15					TEM-1B				OXA-1		NDM-1		aac(6')-Ib-cr_1													aac(3)-IIa
E79	ECOLI	2018-06-15	Rectal swab	NICU	90		R	R	R	I	S	R	S	S	S	S	R		R	S	CTX-M-15					TEM-1B												qnrS1		S83L	D87N	S80I			L458A
E80	ECOLI	2018-06-16	Rectal swab	PICU	38		R	S	S	S	S	S	S	S	S	S	S		R	S	CTX-M-27					TEM-1B														S83L									aadA1
E81	ECOLI	2018-06-16	Rectal swab	GPED	10		R	S	R	S	S	S	S	S	S	S	S		R	S	CTX-M-15																	qnrS1
E82	ECOLI	2018-06-16	Rectal swab	PICU	131	H30	R	I	R	I	S	R	S	S	R	S	R		R	S	CTX-M-15									OXA-1										S83L	D87N	S80I	E84V			I529L	aac(3)-IIa		aadA5
CP7	KPNEU	2018-06-28	Respiratory	PICU	268		R	R	R	R	R	R	R	R	S	S	S	S	S	S	CTX-M-15			SHV-11		TEM-1A				OXA-9		NDM-1			oqxA8	oqxB10		qnrS1											aadA1
E84	KPNEU	2018-07-01	Blood	NICU	45		R	R	R	I	I	R	S	S	S	S	I	S	R	S	CTX-M-15			SHV-27		TEM-1B				OXA-1				aac(6')-Ib-cr_1				qnrB1
CP8	ECOLI	2018-07-03	Rectal swab	GPED	354		R	R	R	R	R	R	R	S	S	S	R	R	R	S	CTX-M-15	CTX-M-24				TEM-1B					DHA-1	OXA-181						qnrS1	qnrB4	S83L	D87N	S80I	E84G			I355T
E85	ECOLI	2018-07-10	Urine	GPED	131	H30	R	R	R	I	S	R	S	S	R	S	R	R	R	S	CTX-M-15									OXA-1				aac(6')-Ib-cr_1						S83L	D87N	S80I	E84V			I529L	aac(3)-IIa		aadA5
E87	ECOLI	2018-07-11	Rectal swab	PICU	131	H30	R	R	R	S	S	R	S	S	S	S	R	R	R	S	CTX-M-15																			S83L	D87N	S80I	E84V			I529L			aadA5
E88	KPNEU	2018-07-11	Rectal swab	PICU	367		R	R	R	S	S	R	S	S	S	S	S	S	R	S	CTX-M-15														oqxA11	oqxB20
E89	ECOLI	2018-07-11	Rectal swab	PICU	62		R	I	R	S	S	R	S	S	R	S	S	S	S	S	CTX-M-15					TEM-1B														S83L							aac(3)-IId		aadA1
CP9	ECOLI	2018-07-14	Rectal swab	PICU	540		R	R	R	R	R	R	R	R	S	S	S	S	R	S	CTX-M-15					TEM-1A				OXA-9		NDM-1	MCR-1					qnrS1											aadA1
E90	KPNEU	2018-07-15	Urine	GPED	280		R	R	R	I	S	R	S	S	R	S	R	S	R	S	CTX-M-15			SHV-27		TEM-1B				OXA-1				aac(6')-Ib-cr_1	oqxA	oqxB31		qnrB1									aac(3)-IIa
E91	ECOLI	2018-07-17	Urine	GPED	73		R	S	R	S	S	I	S	S	S	S	S	S	R	S	CTX-M-15																			S83L									aadA1
E92	ECOLI	2018-07-18	Urine	GPED	156		R	R	R	I	S	R	S	S	S	S	S	S	R	S	CTX-M-15					TEM-1B														S83L	D87N		E84K			L416F
CP15	ECOLI	2018-07-21	Rectal swab	GPED	167		R	R	R	R	R	R	R	R	S	S	R	R	R	R	CTX-M-15											NDM-5								S83L	D87N	S80I			S458A				aadA5
E94	KPNEU	2018-07-26	Urine	NICU	967		R	R	R	S	S	R	S	S	S	S	S	S	R	R	CTX-M-15			SHV-27											oqxA6	oqxB21		qnrS1											aadA2
E95	KPNEU	2018-07-26	Urine	GPED	22		R	R	R	I	S	R	S	S	S	S	I	S	R	S	CTX-M-15								SHV-187	OXA-1				aac(6')-Ib-cr_1	oqxA10	oqxB32		qnrB1
E96	ECOLI	2018-07-26	Urine	GPED	1163		R	I	R	S	S	R	S	S	S	S	I	S	S	S	CTX-M-15																	qnrS1		S83L
E97	ECOLI	2018-07-28	Abscess	GPED	131	H30	R	S	I	S	S	R	S	S	S	S	R	R	R	S	CTX-M-102																			S83L	D87N	S80I	E84V			I529L			aadA5
E98	ECOLI	2018-07-31	Peritoneal fluid	GPED	224		R	R	R	S	S	R	S	S	R	S	R	R	R	S	CTX-M-15																			S83L	D87N	S80I			L458A		aac(3)-IIa		aadA1
E99	ECOLI	2018-07-31	Peritoneal fluid	GPED	48		R	R	R	I	S	R	S	S	R	S	S	S	R	S	CTX-M-15					TEM-1B														S83A							aac(3)-IId		aadA2
E101	ECOLI	2018-08-01	Peritoneal fluid	GPED	10		R	S	R	S	S	R	S	S	S	S	S	S	R	S	CTX-M-15					TEM-1B														S83L
E102	ECOLI	2018-08-02	Ileostomy site	GPED	10992		R	R	R	S	S	R	S	S	S	S	S	S	S	S	CTX-M-15
E103	ECOLI	2018-08-04	Rectal swab	GPED	95		R	I	R	S	S	R	S	S	S	S	S	S	R	S	CTX-M-15																			S83L									aadA2
E104	KPNEU	2018-08-04	Rectal swab	GPED	2074		R	R	R	S	S	R	S	S	S	S	S	S	S	S	CTX-M-15								SHV-187						oqxA11	oqxB19
E105	ECOLI	2018-08-04	Rectal swab	GPED	6496		R	R	R	I	S	R	S	S	S	S	S	S	S	S	CTX-M-15					TEM-1B
E106	ECOLI	2018-08-06	Rectal swab	PICU	5584		R	S	S	S	S	I	S	S	S	S	S	S	S	S	CTX-M-15					TEM-1B												qnrS1
E107	KPNEU	2018-08-09	Wound	NICU	4976		R	R	R	I	I	R	S	S	R	S	I	S	R	I	CTX-M-15			SHV-40		TEM-1B		SHV-11		OXA-1				aac(6')-Ib-cr_1	oqxA	oqxB		qnrB1									aac(3)-IIa
E111	ECOLI	2018-08-17	Urine	GPED	131	H99	R	S	S	S	S	S	S	S	S	S	R	R	S	S	CTX-M-102																			S83L	D87N	S80I	E84V			I529L
E112	ECOLI	2018-08-24	Rectal swab	GPED	38		R	R	R	S	S	R	S	S	S	S	S	S	R	S	CTX-M-14B					TEM-1B					DHA-1							qnrB4											aadA1
CP18	ECOLI	2018-08-28	Rectal swab	GPED	410		R	R	R	R	R	R	R	R	R	S	R	R	R	I	CTX-M-15					TEM-1B				OXA-1	DHA-1	NDM-5		aac(6')-Ib-cr_1						S83L	D87N	S80I			S458A		aac(3)-IId		aadA5
CP19	KPNEU	2018-08-28	Rectal swab	GPED	2096		R	R	R	R	R	R	R	R	R	R	R	R	R	R	CTX-M-15			SHV-106		TEM-1A				OXA-1		OXA-232		aac(6')-Ib-cr_1	oqxA6	oqxB20				S83Y	D87G	80I							aadA2
E117	ECOLI	2018-08-28	Respiratory	NICU	10		R	S	I	S	S	I	S	S	S	S	R	R	R	S	CTX-M-15					TEM-1B												qnrS1		S83L		S80I
E116	ECOLI	2018-08-29	Rectal swab	GPED	48		R	S	S	S	S	S	S	S	S	S	S	S	R	S	CTX-M-15					TEM-1B												qnrS1
E121	ECOLI	2018-08-30	Rectal swab	PICU	131	H41	R	R	R	S	S	R	S	S	S	S	S	S	S	S	CTX-M-15					TEM-1B														S83L						I529L
E122	ECOLI	2018-08-30	Rectal swab	PICU	2186		R	S	S	S	S	S	S	S	S	S	S	S	R	S	CTX-M-15																	qnrS1											aadA5
E128	ECOLI	2018-09-02	Rectal swab	GPED	131	H41	R	R	R	I	S	R	S	S	S	S	S	S	S	S	CTX-M-15					TEM-1B														S83L						I529L
E129	ECOLI	2018-09-02	Urine	GPED	73		R	R	R	S	S	R	S	S	S	S	S	S	S	S	CTX-M-15
CP20	ECOLI	2018-09-03	Rectal swab	PICU	46		R	R	R	R	R	R	R	R	S	S	R	R	R	S	CTX-M-15											NDM-5								S83L	D87N	S80I		S57T					aadA2
E132	ECOLI	2018-09-03	Rectal swab	NICU	131	H41	R	R	R	S	S	R	S	S	S	S	R	R	R	S	CTX-M-15																			S83L	D87Y	S80I	E84V			I529L			aadA5
E133	ECOLI	2018-09-03	Rectal swab	GPED	48		S	R	S	S	S	I	S	S	S	S	S	S	S	S	CTX-M-103			SHV-12							DHA-1							qnrS1
E131	ECOLI	2018-09-04	Urine	GPED	998		R	I	R	S	S	R	S	S	R	S	S	S	S	S	CTX-M-15		TEM-104																								aac(3)-IId
E136	ECOLI	2018-09-06	Rectal swab	GPED	542		R	R	I	R	S	S	S	S	S	S	R	R	S	S	CTX-M-15					TEM-1B					CMY-16							qnrS1		S83L		S80I							aadA5
E137	ECOLI	2018-09-07	Rectal swab	GPED	69		R	S	R	S	S	R	S	S	S	S	S	S	S	S	CTX-M-15																			S83L
E138	ECOLI	2018-09-07	Rectal swab	PICU	10		R	R	R	I	S	R	S	S	S	S	R	R	R	S	CTX-M-15					TEM-1B				OXA-1				aac(6')-Ib-cr_1						S83L	D87Y	S80I			S458A				aadA2
CP21	ECOLI	2018-09-09	Rectal swab	GPED	46		R	R	R	R	R	R	R	R	R	R	R	R	R	S	CTX-M-15					TEM-1B						NDM-5								S83L	D87N	S80I		S57T					aadA2
CP22	KPNEU	2018-09-09	Rectal swab	GPED	ND		R	R	R	R	R	R	R	R	S	S	S	S	S	I	CTX-M-15					TEM-1B						NDM-5			oqxA	oqxB20		qnrS1											aadA1
E141	ECOLI	2018-09-09	Rectal swab	PICU	131	H30	R	R	R	I	S	R	S	S	R	S	R	R	R	S	CTX-M-15									OXA-1				aac(6')-Ib-cr_1						S83L	D87N	S80I	E84V			I529L	aac(3)-IIa		aadA5
E143	KPNEU	2018-09-09	Rectal swab	PICU	13		R	R	R	I	S	R	S	S	R	S	I	S	R	I	CTX-M-15					TEM-1B			SHV-101	OXA-1	DHA-15			aac(6')-Ib-cr_1	oqxA5	oqxB12		qnrB1									aac(3)-IIa
E144	ECOLI	2018-09-09	Rectal swab	GPED	405		R	R	R	I	S	R	S	S	R	S	R	R	R	S	CTX-M-15									OXA-1				aac(6')-Ib-cr_1						S83L	D87N	S80I			S458A		aac(3)-IIa		aadA5
E146	ECOLI	2018-09-10	Rectal swab	GPED	219		R	S	S	S	S	S	S	S	S	S	S	S	R	S	CTX-M-15																	qnrS1											aadA5
E147	ECOLI	2018-09-10	Rectal swab	PICU	224		R	S	R	S	S	I	S	S	R	S	R	R	R	S	CTX-M-55					TEM-141														S83L	D87N	S80I			S458A		aac(3)-VIa		aadA2
E151	ECOLI	2018-09-10	Rectal swab	PICU	315		R	I	R	S	S	R	S	S	S	S	S	S	R	S	CTX-M-15					TEM-1B												qnrS1
E152	ECOLI	2018-09-10	Rectal swab	GPED	450		R	S	R	S	S	I	S	S	S	S	R	R	R	S	CTX-M-15					TEM-1B														S83L	D87N	S80I			S458A
E153	ECOLI	2018-09-10	Rectal swab	GPED	131	H30	R	I	I	R	I	R	S	S	S	S	R	R	R	S	CTX-M-15													aac(6')-Ib-cr_1						S83L	D87N	S80I	E84V			I529L			aadA5
E154	KPNEU	2018-09-10	Rectal swab	GPED	716		R	R	R	I	I	R	S	S	S	S	I	S	R	I	CTX-M-15			SHV-27		TEM-1B				OXA-1				aac(6')-Ib-cr_1	oqxA6	oqxB26		qnrB1
E158	ECOLI	2018-09-11	Rectal swab	GPED	38		R	R	R	S	S	R	S	S	S	S	S	S	S	S	CTX-M-15																	qnrS1
E160	ECOLI	2018-09-11	Rectal swab	PICU	131	H30	R	S	R	S	S	R	S	S	S	S	R	R	R	S	CTX-M-102																			S83L	D87N	S80I	E84V			I529L			aadA5
E161	ECOLI	2018-09-11	Rectal swab	PICU	2040		R	S	I	I	S	R	S	S	S	S	S	S	S	S	CTX-M-15					TEM-1B												qnrS1
E157	KPNEU	2018-09-12	Rectal swab	PICU	37		R	I	I	S	S	R	S	S	S	S	S	S	S	R	CTX-M-15								SHV-110						oqxA	oqxB		qnrS1
E162	ECOLI	2018-09-12	Rectal swab	GPED	405		R	R	R	R	R	R	R	S	S	S	S	S	S	R	CTX-M-15									OXA-1				aac(6')-Ib-cr_1						S83L	D87N	S80I	E84V		S458A				aadA5
E155	ECOLI	2018-09-13	Rectal swab	NICU	8881		R	R	R	I	S	R	S	S	R	S	R	R	R	S	CTX-M-15					TEM-1B				OXA-1				aac(6')-Ib-cr_1						S83L	D87N	S80I			S458A	L416F	aac(3)-IIa		aadA2
E166	ECOLI	2018-09-14	Rectal swab	NICU	181		R	S	I	S	S	S	S	S	S	S	S	S	R	S	CTX-M-15					TEM-1B												qnrS1		S83L	D87N	S80I			E460K	L416F
E167	ECOLI	2018-09-14	Rectal swab	GPED	10993		R	S	S	S	S	S	S	S	S	S	S	S	S	S	CTX-M-15																	qnrS1
E169	ECOLI	2018-09-16	Rectal swab	NICU	4981		R	I	R	S	S	R	S	S	S	S	R	R	R	S	CTX-M-15					TEM-1B												qnrS1		S83L	D87N	S80I			S458A
E170	KPNEU	2018-09-16	Rectal swab	PICU	309		R	S	S	S	S	S	S	S	S	S	S	S	S	S	CTX-M-15					TEM-1B									oqxA	oqxB
E171	ECOLI	2018-09-16	Rectal swab	PICU	229		R	R	R	S	S	R	S	S	S	S	S	S	R	R	CTX-M-15								SHV-187									qnrS1
E172	KPNEU	2018-09-16	Rectal swab	GPED	998		R	I	R	R	S	R	S	S	S	S	S	S	R	S	CTX-M-15		TEM-169
E173	ECOLI	2018-09-16	Rectal swab	PICU	88		R	S	S	S	S	S	S	S	S	S	S	S	R	S	CTX-M-15					TEM-1B
E165	ECOLI	2018-09-17	Urine	GPED	1193		R	S	R	S	S	S	S	S	S	S	R	R	R	S	CTX-M-8																			S83L	D87N	S80I			S458A
E175	KPNEU	2018-09-17	Rectal swab	NICU	4976		R	R	R	I	S	R	S	S	R	S	I	S	R	S	CTX-M-15					TEM-1B			SHV-187	OXA-1				aac(6')-Ib-cr_1	oqxA5	oqxB32		qnrB1									aac(3)-IIa
E178	ECOLI	2018-09-17	Rectal swab	GPED	73		R	R	R	S	S	R	S	S	S	S	S	S	S	S	CTX-M-15																			S83L
E180	ECOLI	2018-09-17	Rectal swab	NICU	450		R	S	S	S	S	S	S	S	S	S	R	R	R	S	CTX-M-15					TEM-1B											qepA1			S83L	D87N	S80I			S458A				aadA2
E181	ECOLI	2018-09-17	Rectal swab	GPED	131	H30	R	R	R	S	S	R	S	S	S	S	R	R	R	S	CTX-M-15									OXA-1										S83L	D87N	S80I	E84V			I529L
CP25	ECOLI	2018-09-18	Rectal swab	GPED	3541		R	R	R	R	R	R	R	S	S	S	S	S	S	S	CTX-M-14b					TEM-1B						OXA-244
E183	ECOLI	2018-09-18	Urine	GPED	69		R	R	R	S	S	R	S	S	S	S	S	S	S	S	CTX-M-15																			S83L
E184	KPNEU	2018-09-18	Abscess	GPED	307		R	R	R	I	I	R	S	S	R	S	R	R	R	R	CTX-M-15			SHV-106		TEM-1B				OXA-1				aac(6')-Ib-cr_1	oqxA5	oqxB19		qnrE1	qnrB1	S83I		80I					aac(3)-IIa		aadA1
E185	ECOLI	2018-09-19	Rectal swab	GPED	38		R	R	I	R	S	R	S	S	R	S	R	R	R	S	CTX-M-15									OXA-1	DHA-1			aac(6')-Ib-cr_1				qnrB4		S83L		E84G					aac(3)-IIa		aadA1
E186	ECOLI	2018-09-20	Rectal swab	GPED	443		R	R	S	S	S		S	S	S	S	S	R	S	S	CTX-M-15				TEM-35															S83L	D87N	S80I				L416F
E187	KPNEU	2018-09-20	Rectal swab	PICU	967		R	R	R	I	S		S	S	S	S	S	S	S	I	CTX-M-15			SHV-27											oqxA6	oqxB21		qnrS1											aadA2
E188	KPNEU	2018-09-20	Rectal swab	PICU	219		R	R	R	S	S	R	S	S	S	S	R	S	R	I	CTX-M-15								SHV-145						oqxA10	oqxB13		qnrS1											aadA2
E189	ECOLI	2018-09-20	Rectal swab	PICU	10994		R	R	S	R	S		S	S	S	S	S	S	S	S	CTX-M-1
E190	KPNEU	2018-09-20	Rectal swab	GPED	20		R	S	S	S	S		S	S	S	S	S	S	S	S	CTX-M-15								SHV-187						oqxA	oqxB32
E191	ECOLI	2018-09-20	Rectal swab	GPED	1727		R	R	R	I	S		S	S	S	S	S	S	S	S	CTX-M-15																	qnrS1
E202	ECOLI	2018-09-22	Rectal swab	GPED	648		R	R	R	I	S	R	S	S	R	S	R	R	R	S	CTX-M-15					TEM-1B				OXA-1				aac(6')-Ib-cr_1						S83L	D87N	S80I			S458A		aac(3)-IIa		aadA5
E206	KPNEU	2018-09-22	Rectal swab	GPED	10996		R	R	R	I	S	R	S	S	R	S	R	R	R	S	CTX-M-15					TEM-1B
E507	ECOLI	2018-09-22	Blood	GPED	131	H30	R	R	R	R	R	R	S	S	S	S	R	R	R	S	CTX-M-15									OXA-1				aac(6')-Ib-cr_1						S83L	D87N	S80I	E84V			I529L			aadA5
E192	ECOLI	2018-09-23	Rectal swab	GPED	115		R	S	R	S	S	R	S	S	I	S	R	R	R	S	CTX-M-15					TEM-141							MCR-1							S83L	D87N	S80I							aadB
E195	ECOLI	2018-09-24	Rectal swab	GPED	648		R	R	R	I	S	R	S	S	R	S	R	R	R	S	CTX-M-15					TEM-1B				OXA-1				aac(6')-Ib-cr_1						S83L	D87N	S80I			S458A		aac(3)-IIa		aadA5
E196	ECOLI	2018-09-24	Rectal swab	GPED	295		R	I	I	S	S	S	S	S	S	S	S	S	S	S	CTX-M-15		TEM-104															qnrS1											aadA1
E197	ECOLI	2018-09-24	Rectal swab	NICU	4981		R	R	R	I	S	R	S	S	S	S	R	R	R	S	CTX-M-15					TEM-1B												qnrS1		S83L	D87N	S80I			S458A
E204	ECOLI	2018-09-24	Rectal swab	GPED	131	H30	R	R	R	R	I	R	S	S	S	S	S	S	R	S	CTX-M-15				TEM-33															S83L		S80I							aadA5
E205	ECOLI	2018-09-24	Rectal swab	PICU	10		R	R	R	S	S	R	S	S	S	S	S	S	R	I	CTX-M-15																			S83A									aadA1
E207	ECOLI	2018-09-24	Rectal swab	PICU	73		R	S	I	S	S	R	S	S	S	S	R	R	S	S	CTX-M-15																			S83L
E208	KPNEU	2018-09-24	Rectal swab	PICU	309		R	R	R	R	S	R	S	S	S	S	S	S	R	S	CTX-M-15								SHV-187						oqxA	oqxB
E200	ECOLI	2018-09-26	Rectal swab	NICU	8881		R	R	R	I	S	R	S	S	R	S	R	R	R	S	CTX-M-15					TEM-1B				OXA-1				aac(6')-Ib-cr_1						S83L	D87N	S80I			S458A		aac(3)-IIa		aadA2
E203	ECOLI	2018-09-26	Peritoneal fluid	GPED	10		R	S	S	S	S	S	S	S	S	S	I	I	R	S	CTX-M-15																	qnrS1		S83L									aadA5
E211	ECOLI	2018-09-27	Rectal swab	GPED	69		R	S	R	S	S	I	S	S	S	S	S	S	S	S	CTX-M-15
E213	KPNEU	2018-09-29	Urine	GPED	309		R	I	I	R	S	R	S	S	S	S	S	S	R	S	CTX-M-15								SHV-187						oqxA	oqxB
E215	ECOLI	2018-09-30	Rectal swab	GPED	1611		R	R	R	I	S		S	S	S	S	S	S	S	S	CTX-M-15																	qnrS1		S83L
E217	ECOLI	2018-09-30	Rectal swab	GPED	484		R	S	S	S	S		S	S	S	S	S	S	S	S	CTX-M-15																	qnrS1
E219	ECOLI	2018-09-30	Rectal swab	PICU	38		R	R	S	R	S		S	S	S	S	S	S	R	I	CTX-M-15					TEM-1C																							aadA1
E220	ECOLI	2018-09-30	Rectal swab	PICU	3346		R	S	S	R	S		S	S	R	S	S	S	R	S	CTX-M-15																			S83L							aac(3)-IId		aadA1
CP26	ECOLI	2018-10-01	Rectal swab	GPED	410		R	R	R	R	R	R	R	R	S	S	R	R	R	S	CTX-M-3					TEM-1B						NDM-5								S83L	D87N	S80I			S458A				aadA2
E221	KPNEU	2018-10-03	Rectal swab	GPED	307		R	R	R	R	S		S	S	R	S	R	R	R	I	CTX-M-15			SHV-106		TEM-206				OXA-1				aac(6')-Ib-cr_1	oqxA5	oqxB19		qnrB1		S83I		80I					aac(3)-IIa
E223	ECOLI	2018-10-03	Rectal swab	GPED	540		R	R	S	R	S		S	S	S	S	I	R	R	S	CTX-M-15					TEM-1B												qnrS1
E224	KPNEU	2018-10-03	Rectal swab	NICU	1119		R	R	S	R	S		S	S	R	S	S	S	R	I	CTX-M-15					TEM-1B			SHV-172						oqxA6	oqxB32											aac(3)-IIa		aadA1
E228	ECOLI	2018-10-04	Rectal swab	PICU	131	H41	R	R	R	S	S	R	S	S	S	S	S	S	R	S	CTX-M-15					TEM-1B														S83L						I529L			aadA5
E233	ECOLI	2018-10-05	Rectal swab	GPED	517		R	R	R	S	S	R	S	S	S	S	R	S	R	S	CTX-M-15					TEM-1B												qnrS1
E234	ECOLI	2018-10-05	Rectal swab	PICU	155		R	S	S	S	S	S	S	S	S	S	S	S	R	S	CTX-M-15					TEM-1B												qnrS1
E227	KPNEU	2018-10-06	Sputum	PICU	111		R	R	R	S	S	R	S	S	S	S	S	S	R	S	CTX-M-15								SHV-187						oqxA8	oqxB21		qnrS1											aadA2
E236	ECOLI	2018-10-06	Rectal swab	NICU	156		R	R	I	R	S		S	S	S	S	R	R	R	S	CTX-M-15					TEM-1B											qepA1			S83L	D87N		E84K			L416F
E229	ECOLI	2018-10-07	Rectal swab	PICU	131	H30	R	I	R	S	S	R	S	S	S	S	R	R	R	S	CTX-M-102																			S83L	D87N	S80I	E84V			I529L			aadA5
E230	ECOLI	2018-10-07	Rectal swab	GPED	10		R	S	S	S	S	S	S	S	S	S	R	R	R	S	CTX-M-15																	qnrS1		S83L	D87N	S80I				L416F
E231	ECOLI	2018-10-07	Rectal swab	GPED	10		R	R	R	S	S	R	S	S	S	S	S	S	R	S	CTX-M-15																	qnrS1											aadA1
E247	KPNEU	2018-10-07	Rectal swab	NICU	1653		R	I	S	I	S		S	S	S	S	S	S	S	I	CTX-M-15								SHV-187						oqxA10	oqxB32
E248	ECOLI	2018-10-07	Rectal swab	NICU	8881		R	R	R	I	S		S	S	R	S	R	R	R	S	CTX-M-15					TEM-1B				OXA-1										S83L	D87N	S80I			S458A		aac(3)-IIa		aadA2
E251	ECOLI	2018-10-07	Rectal swab	GPED	1294		R	S	S	I	S		S	S	S	S	S	S	R	S	CTX-M-15					TEM-1B												qnrS1
E253	ECOLI	2018-10-07	Abscess	GPED	93		R	S	R	S	S	S	S	S	R	S	S	S	R	S	CTX-M-15					TEM-1B												qnrS1									aac(3)-IId		aadA5
E232	KPNEU	2018-10-08	Rectal swab	GPED	551		R	R	R	R	R	R	S	S	R	S	R	S	R	R	CTX-M-15					TEM-1B			SHV-187	OXA-1				aac(6')-Ib-cr_1	oqxA10	oqxB12		qnrB1									aac(3)-IIa
E254	ECOLI	2018-10-08	Rectal swab	GPED	1147		R	S	S	S	S		S	S	S	S	S	S	S	S	CTX-M-15																	qnrS1
E258	ECOLI	2018-10-08	Rectal swab	GPED	10		R	R	R	R	S		S	S	R	S	S	S	R	S	CTX-M-15					TEM-1B														S83L							aac(3)-IId		aadA2
E262	ECOLI	2018-10-08	Rectal swab	GPED	38		R	S	R	R	S		S	S	S	S	S	S	S	S	CTX-M-14b																												aadA1
E263	ECOLI	2018-10-08	Rectal swab	PICU	73		R	S	S	S	S		S	S	S	S	S	S	S	S	CTX-M-15																			S83L
E264	ECOLI	2018-10-08	Rectal swab	PICU	131	H41	R	S	S	S	S		S	S	S	S	R	R	S	S	CTX-M-159																			S83L	D87N	S80I	E84V			I529L
E265	ECOLI	2018-10-08	Rectal swab	GPED	394		R	S	S	S	S		S	S	S	S	S	S	S	S	CTX-M-15																	qnrS1
E266	ECOLI	2018-10-08	Rectal swab	GPED	38		R	S	S	S	S		S	S	S	S	R	R	R	S	CTX-M-15																			S80I	D87Y	S80I			S458A	I529L
E273	ECOLI	2018-10-08	Rectal swab	GPED	ND		R	S	S	R	S		S	S	S	S	R	R	R	S	CTX-M-15					TEM-1B												qnrS1											aadA5
E269	ECOLI	2018-10-09	Rectal swab	GPED	1695		R	S	S	I	S		S	S	S	S	S	S	R	S	CTX-M-15					TEM-1B																							aadA5
E280	ECOLI	2018-10-09	Rectal swab	GPED	131	H41	R	R	R	I	S		S	S	S	S	S	S	R	S	CTX-M-15					TEM-1B														S83L						I529L			aadA5
E249	ECOLI	2018-10-10	Rectal swab	GPED	10997		R	R	R	R	S		S	S	S	S	R	R	R	S	CTX-M-15					TEM-1B												qnrS1		S83L	D87N	S80I			S458A
E279	ECOLI	2018-10-10	Rectal swab	GPED	349		S	R	S	R	S		S	S	S	S	S	S	R	S	CTX-M-15		TEM-104															qnrS1
E284	ECOLI	2018-10-12	Rectal swab	GPED	38		R	S	R	R	S		S	S	S	S	S	S	R	I	CTX-M-14b					TEM-1B																							aadA1
E285	KPNEU	2018-10-12	Rectal swab	GPED	45		R	R	S	R	R		S	S	S	S	S	I	R	I	CTX-M-15								SHV-194		DHA-1				oqxA11	oqxB20		qnrB4											aadA5
E286	ECOLI	2018-10-12	Rectal swab	GPED	328		R	S	S	R	S		S	S	S	S	S	S	S	S	CTX-M-102					TEM-1B
E287	ECOLI	2018-10-13	Urine	GPED	181		R	R	R	R	R	R	S	S	S	S	S	S	R	S	CTX-M-15					TEM-1B												qnrS1
E288	ECOLI	2018-10-16	Urine	GPED	752		R	S	I	S	S	R	S	S	S	S	S	S	S	S	CTX-M-15					TEM-1B												qnrS1	qnrB7	S83L									aadA1
E294	ECOLI	2018-10-16	Urine	GPED	405		R	R	R	R	S	R	I	S	S	S	R	R	R	S	CTX-M-15																			S83L	D87N	S80I			S458A				aadA5
E293	KPNEU	2018-10-17	Skin swab	NICU	391		R	R	I	S	S	R	S	S	S	S	S	S	R	S	CTX-M-15														oqxA7	oqxB32
E295	ECOLI	2018-10-18	Rectal swab	GPED	1193		R	I	R	S	S	R	S	S	R	S	R	R	R	S	CTX-M-15									OXA-1				aac(6')-Ib-cr_1						S83L	D87N	S80I				L416F	aac(3)-IIa
E298	ECOLI	2018-10-18	Urine	GPED	410		R	R	R	R	I		S	S	S	S	R	R	R	S	CTX-M-15																			S83L	D87N	S80I			S458A				aadA5
E299	ECOLI	2018-10-19	Rectal swab	GPED	69		R	S	S	R	S		S	S	S	S	S	S	R	S	CTX-M-15					TEM-1B												qnrS1											aadA5
E300	ECOLI	2018-10-19	Rectal swab	GPED	38		R	R	S	R	S		S	S	S	S	S	I	S	S	CTX-M-15					TEM-1B												qnrS1		S83A
E301	ECOLI	2018-10-20	Rectal swab	PICU	1727		R	R	S	I	S		S	S	S	S	S	S	S	S	CTX-M-15																	qnrS1
E302	ECOLI	2018-10-20	Rectal swab	GPED	73		R	R	S	I	S		S	S	R	S	S	S	R	S	CTX-M-15																			S83L							aac(3)-IIa		aadA5
E303	KPNEU	2018-10-21	Rectal swab	NICU	967		S	R	I	R	R		S	S	R	S	R	R	R	R				SHV-27		TEM-1B									oqxA6	oqxB19				S83L	D87N	80I					aac(3)-IIa		aadA1
E306	KPNEU	2018-10-21	Rectal swab	NICU	4976		R	I	S	R	R		S	S	R	S	S	S	R	I	CTX-M-15					TEM-1B			SHV-187	OXA-1				aac(6')-Ib-cr_1	oqxA5	oqxB32		qnrB1									aac(3)-IIa
E307	KPNEU	2018-10-21	Rectal swab	PICU	268		R	I	S	R	R		S	S	S	S	S	S	R	S	CTX-M-15					TEM-1B		SHV-11		OXA-1				aac(6')-Ib-cr_1	oqxA8	oqxB10
E308	ECOLI	2018-10-21	Rectal swab	PICU	38		R	R	R	I	S		S	S	S	S	S	S	R	S	CTX-M-15					TEM-1B												qnrS1
E310	ECOLI	2018-10-21	Rectal swab	GPED	155		R	S	S	R	S		S	S	S	S	S	S	R	S	CTX-M-15		TEM-104															qnrS1											aadA5
E311	KPNEU	2018-10-21	Rectal swab	NICU	1653		R	R	R	I	S	R	S	S	S	S	R	R	R	S	CTX-M-15								SHV-187						oqxA10	oqxB32
E313	ECOLI	2018-10-22	Rectal swab	GPED	1193		R	R	I	R	S		S	S	S	S	R	R	S	S	CTX-M-15					TEM-1B														S83L	D87N	S80I				L416F
E317	KPNEU	2018-10-22	Rectal swab	PICU	268		R	R	I	R	S		S	S	S	S	S	S	R	S	CTX-M-15					TEM-1B		SHV-11							oqxA8	oqxB10		qnrB1
E318	ECOLI	2018-10-22	Rectal swab	PICU	8881		R	R	R	R	S		S	S	R	S	R	R	R	I	CTX-M-15					TEM-1B								aac(6')-Ib-cr_1						S83L	D87N	S80I			S458A		aac(3)-IIa		aadA2
E320	KPNEU	2018-10-22	Rectal swab	PICU	133		R	S	S	R	S		S	S	S	S	S	S	S	I	CTX-M-1							SHV-75							oqxA10	oqxB4
E312	ECOLI	2018-10-23	Urine	GPED	131	H30	R	R	I	R	I		S	S	S	S	R	R	R	S	CTX-M-15									OXA-1				aac(6')-Ib-cr_1						S83L	D87N	S80I	E84V			I529L			aadA5
E327	ECOLI	2018-10-24	Rectal swab	GPED	131	H41	R	S	R	S	S		S	S	S	S	R	R	R	S	CTX-M-102																			S83L	D87N	S80I	E84V			I529L			aadA5
E321	ECOLI	2018-10-25	Respiratory	PICU	155		R	S	I	S	S	I	S	S	S	S	S	S	R	S	CTX-M-15		TEM-104															qnrS1											aadA5
E324	ECOLI	2018-10-25	Rectal swab	PICU	131	H30	R	S	S	I	S		S	S	S	S	R	R	R	S	CTX-M-102								SHV-187						oqxA10					S83L	D87N	S80I	E84V			I529L			aadA5
E325	ECOLI	2018-10-25	Rectal swab	GPED	616		R	S	S	I	S		S	S	S	S	S	S	R	S	CTX-M-15										DHA-1							qnrS1	qnrB4
E326	KPNEU	2018-10-25	Rectal swab	GPED	661		R	S	S	S	S		S	S	S	S	S	S	R	I	CTX-M-15			SHV-27											oqxA10	oqxB25		qnrS1											aadA2
E322	ECOLI	2018-10-26	Peritoneal fluid	GPED	131	H41	R	R	R	S	S	R	S	S	S	S	S	S	R	S	CTX-M-15																			S83L
E328	ECOLI	2018-10-27	Ascitic fluid	GPED	1193		R	S	R	S	S	R	S	S	R	S	R	R	R	S	CTX-M-15									OXA-1										S83L	D87N	S80I				L416F	aac(3)-IIa
E336	ECOLI	2018-10-27	Rectal swab	NICU	8881		R	R	R	R	S		S	S	R	S	R	R	R	I	CTX-M-15					TEM-1B				OXA-1										S83L	D87N	S80I			S458A		aac(3)-IIa		aadA2
E329	KPNEU	2018-10-28	Rectal swab	NICU	405		R	I	S	S	S		I	S	S	S	S	S	S	R	CTX-M-15					TEM-1B		SHV-76		OXA-1					oqxA3	oqxB11		qnrB1									aac(3)-IIa
E330	ECOLI	2018-10-28	Rectal swab	GPED	131	H41	R	R	R	R	S		S	S	S	S	S	S	R	S	CTX-M-15					TEM-1B														S83L						I529L			aadA5
E334	ECOLI	2018-10-28	Rectal swab	NICU	10		R	S	S	I	S		S	S	S	S	R	R	R	S	CTX-M-15					TEM-1B												qnrS1		S83L		S80I
E341	KPNEU	2018-10-29	Rectal swab	GPED	336		R	R	R	R	R		R	R	R	R	S	S	R	I	CTX-M-15					TEM-1B			SHV-187			NDM-1			oqxA6	oqxB24		qnrS1	qnrB1
E343	ECOLI	2018-10-29	Rectal swab	GPED	131	H41	R	R	I	I	S		S	S	S	S	R	R	R	S	CTX-M-15																			S83L	D87Y	S80I	E84V			I529L			aadA5
E344	KPNEU	2018-10-29	Rectal swab	GPED	4976		R	S	S	R	R		S	S	S	S	S	S	R	S	CTX-M-15					TEM-1B			SHV-187	OXA-1				aac(6')-Ib-cr_1	oqxA5	oqxB32		qnrB1									aac(3)-IIa
E345	ECOLI	2018-10-29	Rectal swab	GPED	1193		R	S	S	R	I		S	S	R	S	R	R	S	S	CTX-M-15					TEM-1B				OXA-1				aac(6')-Ib-cr_1						S83L	D87N	S80I				L416F	aac(3)-IIa
E346	ECOLI	2018-10-29	Rectal swab	PICU	131	H30	R	R	S	R	S		S	S	R	S	R	R	S	S	CTX-M-15									OXA-1				aac(6')-Ib-cr_1						S83L	D87N	S80I	E84V			I529L	aac(3)-IIa
E347	ECOLI	2018-10-29	Rectal swab	PICU	38		R	R	R	R	I		S	S	S	S	S	S	R	S	CTX-M-15						TEM-209											qnrS1
E348	ECOLI	2018-10-29	Rectal swab	GPED	38		R	R	R	R	I		S	S	S	S	R	R	R	I	CTX-M-15									OXA-1				aac(6')-Ib-cr_1						S83L	D87N	S80I		S57T	S458A				aadA1
E350	ECOLI	2018-10-29	Rectal swab	PICU	10		R	S	S	R	S		S	S	S	S	R	I	R	S	CTX-M-15					TEM-1B												qnrS1		S83L
E352	ECOLI	2018-10-29	Rectal swab	GPED	501		R	R	S	R	S		S	S	S	S	R	R	R	I	CTX-M-15										CMY-131									S83L	D87N	S80I	E84G	S57T
E353	KPNEU	2018-10-29	Rectal swab	GPED	111		R	R	R	R	S		S	S	S	S	S	S	R	R	CTX-M-15								SHV-187
E355	ECOLI	2018-10-29	Rectal swab	PICU	1193		R	S	S	S	S		S	S	S	S	R	R	S	S	CTX-M-159													aac(6')-Ib-cr_1						S83L	D87N	S80I				L416F	aac(3)-IIa		aadA5
E356	KPNEU	2018-10-29	Rectal swab	GPED	485		R	I	R	R	I		S	S	R	S	I	S	R	I	CTX-M-15					TEM-1B			SHV-194	OXA-1																	aac(3)-IIa
E339	ECOLI	2018-10-30	Urine	GPED	131	H30	R	S	R	S	S		S	S	S	S	R	R	S	S	CTX-M-15																			S83L	D87N	S80I	E84V			I529L
CP28	KPNEU	2018-11-01	Rectal swab	GPED	337		R	R	I	R	R		R	R	R	R	R	R	R	I	CTX-M-15					TEM-1A			SHV-187	OXA-9		NDM-1						qnrS1											aadA2
E357	ECOLI	2018-11-02	Rectal swab	GPED	131	ND	R	S	S	S	S	S	S	S	S	S	S	R	S	S	CTX-M-159																												aadA5
E359	KPNEU	2018-11-02	Respiratory	PICU	307		R	I	I	S	S	R	S	S	S	S	S	S	S	R	CTX-M-15			SHV-106		TEM-206				OXA-1					oqxA	oqxB		qnrS1		S83I		80I
E360	ECOLI	2018-11-04	Urine	GPED	73		R	S	I	S	S	R	S	S	S	S	S	S	S	S	CTX-M-15					TEM-1B																					aac(3)-IId
E364	ECOLI	2018-11-04	Rectal swab	PICU	1642		R	S	S	S	S		S	S	S	S	S	S	S	S	CTX-M-15																	qnrS1
E378	ECOLI	2018-11-05	Rectal swab	PICU	515		R	S	S	I	S		S	S	S	S	S	S	R	S	CTX-M-15					TEM-1B												qnrS1
E379	KPNEU	2018-11-05	Rectal swab	PICU	37		R	S	S	I	S		S	S	S	S	R	R	S	R	CTX-M-15								SHV-110						oqxA	oqxB		qnrS1
E381	ECOLI	2018-11-05	Rectal swab	GPED	38		R	S	S	I	S		S	S	S	S	S	S	R	I	CTX-M-14b																			S83L
E382	ECOLI	2018-11-05	Rectal swab	PICU	155		R	S	S	I	S		S	S	S	S	S	S	R	S	CTX-M-15		TEM-104															qnrS1											aadA5
E385	ECOLI	2018-11-06	Rectal swab	PICU	394		R	S	S	S	S		S	S	S	S	S	S	S	S	CTX-M-15																	qnrS1
E388	ECOLI	2018-11-06	CSF	GPED	131	H30	R	R	R	I	S	R	S	S	R	S	R	R	R	S	CTX-M-15									OXA-1										S83L	D87N	S80I	E84V			I529L	aac(3)-IIa		aadA5
E387	ECOLI	2018-11-07	Urine	GPED	636		R	R	R	I	S	R	S	S	R	S	S	S	R	S	CTX-M-15				TEM-35															S83L									aadA1
E384	ECOLI	2018-11-09	Rectal swab	GPED	58		R	R	R	R	S		S	S	S	S	S	S	R	S	CTX-M-15					TEM-1B												qnrS1
E401	KPNEU	2018-11-11	Rectal swab	NICU	307		R	S	S	I	S		S	S	S	S	I	I	S	I	CTX-M-15			SHV-106		TEM-1B				OXA-1				aac(6')-Ib-cr_1	oqxA5	oqxB19		qnrB1		S83I		80I							aadA2
E402	ECOLI	2018-11-11	Rectal swab	GPED	515		R	S	S	R	S		S	S	S	S	S	S	R	S	CTX-M-15					TEM-1B												qnrS1
E403	KPNEU	2018-11-11	Rectal swab	NICU	37		R	I	S	I	S		S	S	S	S	S	S	S	R	CTX-M-15								SHV-110						oqxA	oqxB		qnrS1
E406	ECOLI	2018-11-11	Rectal swab	GPED	131	H30	R	R	R	R	R		S	S	S	S	S	S	R	S	CTX-M-15				TEM-33															S83L		S80I							aadA5
E409	ECOLI	2018-11-11	Rectal swab	PICU	501		R	R	S	R	R		S	S	S	S	R	R	R	I	CTX-M-15										CMY-131									S83L	D87N	S80I	E84G	S57T					aadA5
E412	ECOLI	2018-11-12	Rectal swab	PICU	58		R	S	S	R	S		S	S	S	S	S	S	R	S	CTX-M-15					TEM-1B												qnrS1
E413	ECOLI	2018-11-12	Rectal swab	GPED	48		R	S	S	S	S		S	S	S	S	R	R	S	S	CTX-M-15																	qnrS1		S83L	D87N	S80I
E414	ECOLI	2018-11-12	Rectal swab	PICU	1722		R	I	R	S	S		S	S	S	S	S	S	S	S	CTX-M-15																	qnrS1
E415	KPNEU	2018-11-12	Rectal swab	PICU	219		R	R	S	I	S		S	S	S	S	S	S	R	R	CTX-M-15								SHV-194						oqxA10	oqxB13		qnrS1											aadA2
E416	KPNEU	2018-11-12	Rectal swab	PICU	45		R	I	S	R	S		S	S	S	S	S	S	R	I	CTX-M-15					TEM-1B			SHV-194						oqxA11	oqxB20		qnrS1
E417	ECOLI	2018-11-12	Rectal swab	PICU	38		R	R	S	R	S		S	S	S	S	R	R	R	S	CTX-M-3										CMY-2									S83L	D87N	S80I		A108T
E419	ECOLI	2018-11-13	Rectal swab	GPED	4684		R	S	S	R	S		S	S	S	S	S	S	R	S	CTX-M-15					TEM-1B												qnrS1
E420	ECOLI	2018-11-13	Rectal swab	PICU	2562		R	S	S	R	S		S	S	S	S	S	S	R	S	CTX-M-15		TEM-104															qnrS1											aadA5
E421	ECOLI	2018-11-13	Rectal swab	GPED	442		R	S	S	S	S		S	S	S	S	S	S	S	S	CTX-M-15																	qnrS1											aadA1
E422	ECOLI	2018-11-14	Rectal swab	PICU	5614		R	S	S	S	S		S	S	S	S	S	S	S	S	CTX-M-15																	qnrS1
E424	ECOLI	2018-11-14	Rectal swab	GPED	34		R	R	S	R	S		S	S	R	S	S	S	R	S	CTX-M-15				TEM-35													qnrS1									aac(3)-IId		aadA5
E425	ECOLI	2018-11-14	Rectal swab	GPED	10		R	S	S	R	S		S	S	S	S	I	I	R	S	CTX-M-15					TEM-1B												qnrS1		S83L
E427	ECOLI	2018-11-15	Rectal swab	PICU	10994		R	S	S	R	R		S	S	S	S	S	S	S	S	CTX-M-1						TEM-210
E428	KPNEU	2018-11-15	Rectal swab	GPED	307		R	I	S	R	S		S	S	S	S	R	R	R	I	CTX-M-15			SHV-106		TEM-1B				OXA-1				aac(6')-Ib-cr_1	oqxA5	oqxB19		qnrB1		S83I		80I
E433	ECOLI	2018-11-15	Rectal swab	GPED	131	H30	R	R	R	R	S		S	S	S	S	R	R	R	S	CTX-M-15					TEM-1B														S83L	D87N	S80I	E84V			I529L
E429	KPNEU	2018-11-16	Urine	GPED	391		R	R	R	S	S		S	S	S	S	S	S	R	S	CTX-M-15					TEM-1B			SHV-187						oqxA7	oqxB32
E431	ECOLI	2018-11-16	Rectal swab	GPED	38		R	I	R	R	R		S	S	S	S	S	S	R	S	CTX-M-159											OXA-244																	aadA5
E432	ECOLI	2018-11-16	Rectal swab	GPED	10		R	S	S	R	S		S	S	S	S	S	S	S	S	CTX-M-1																	qnrS1
E440	KPNEU	2018-11-18	Rectal swab	NICU	1653		R	I	S	I	S		S	S	S	S	S	S	R	S	CTX-M-15								SHV-187						oqxA10	oqxB32
E442	ECOLI	2018-11-18	Rectal swab	PICU	206		R	S	S	S	S		S	S	S	S	S	S	S	S	CTX-M-15																	qnrS1						A56T
E443	ECOLI	2018-11-18	Rectal swab	GPED	773		R	S	S	S	S		S	S	S	S	R	R	S	I	CTX-M-15																			S83L	D87N	S80I				L416F
E444	ECOLI	2018-11-18	Rectal swab	NICU	8881		R	R	R	R	S		S	S	R	S	R	R	R	I	CTX-M-15					TEM-1B				OXA-1				aac(6')-Ib-cr_1						S83L	D87N	S80I			S458A		aac(3)-IIa		aadA2
E435	ECOLI	2018-11-19	Rectal swab	GPED	10998		R	S	S	S	S	S	S	S	S	S	S	S	S	S	CTX-M-15																	qnrS1
E436	ECOLI	2018-11-19	Rectal swab	GPED	2089		R	I	I	I	I	I	S	S	S	S	R	R	R	S	CTX-M-15																	qnrS1		S83L									aadA5
E437	ECOLI	2018-11-19	Rectal swab	PICU	34		R	S	S	S	S	I	S	S	S	S	S	S	R	S	CTX-M-15																	qnrS1											aadA5
E438	KPNEU	2018-11-19	Rectal swab	PICU	4427		R	I	R	S	S	R	S	S	S	S	S	S	R	S	CTX-M-15								SHV-193						oqxA	oqxB12		qnrS1											aadA2
E451	ECOLI	2018-11-20	Rectal swab	GPED	3873		R	S	I	S	S	I	S	S	S	S	S	S	R	S	CTX-M-15					TEM-1B												qnrS1											aadA5
E452	ECOLI	2018-11-20	Rectal swab	GPED	38		R	S	R	I	S	R	S	S	S	S	S	S	R	S	CTX-M-14b					TEM-1B																							aadA1
E454	ECOLI	2018-11-20	Rectal swab	GPED	130		R	S	S	S	S	I	S	S	S	S	S	S	R	S	CTX-M-15																							S57T					aadA5
E448	ECOLI	2018-11-21	Rectal swab	PICU	38		R	R	R	R	S		S	S	S	S	S	S	S	R	CTX-M-15
E447	ECOLI	2018-11-22	Rectal swab	GPED	34		R	S	S	S	S	I	S	S	S	S	R	I	R	S	CTX-M-15																	qnrS1		S83L									aadA5
E461	ECOLI	2018-11-22	Urine	GPED	6355		R	R	R	I	S	R	S	S	R	S	S	S	S	S	CTX-M-15									OXA-1				aac(6')-Ib-cr_1													aac(3)-IIa
E456	ECOLI	2018-11-23	Urine	GPED	10		I	S	S	S	S	S	S	S	S	S	S	S	R	S	CTX-M-15																	qnrS1		S83L									aadA5
E457	ECOLI	2018-11-23	Skin swab	GPED	2076		R	R	R	I	I	R	S	S	S	S	S	S	S	S	CTX-M-15					TEM-1B														S83L
E459	KPNEU	2018-11-25	Throat swab	GPED	2167		R	R	R	R	R	R	S	S	R	S	R	S	R	S	CTX-M-15					TEM-1B			SHV-187	OXA-1					oqxA6	oqxB22		qnrB1									aac(3)-IIa
E460	ECOLI	2018-11-26	Urine	GPED	38		R	S	R	I	S	R	S	S	S	S	S	S	R	S	CTX-M-14b																							S57T					aadA1
E464	KPNEU	2018-11-27	Rectal swab	PICU	45		R	R	R	I	S	R	S	S	S	S	S	S	R	S	CTX-M-15			SHV-27		TEM-1B								aac(6')-Ib-cr_1	oqxA11	oqxB20		qnrB1
E465	KPNEU	2018-11-27	Rectal swab	GPED	45		R	R	R	I	S	R	S	S	S	S	R	S	R	S	CTX-M-15			SHV-27		TEM-1B				OXA-1				aac(6')-Ib-cr_1	oqxA11	oqxB20		qnrB1
E466	ECOLI	2018-11-27	Rectal swab	GPED	515		R	S	I	S	S	I	S	S	S	S	S	S	R	S	CTX-M-15					TEM-1A												qnrS1											aadA12
E467	KPNEU	2018-11-28	CSF	GPED	307		R	R	R	I	S	R	S	S	R	S	R	R	R	R	CTX-M-15			SHV-106		TEM-1B				OXA-1				aac(6')-Ib-cr_1	oqxA5	oqxB19		qnrB1		S83I		80I					aac(3)-IIa
E468	KPNEU	2018-11-28	Rectal swab	PICU	133		R	R	R	R	R		S	S	S	S	I	S	R	R	CTX-M-15					TEM-1B		SHV-75		OXA-1				aac(6')-Ib-cr_1	oqxA10	oqxB4		qnrB1
E469	ECOLI	2018-11-28	Rectal swab	GPED	131	H41	R	S	S	S	S		S	S	S	S	S	S	R	S	CTX-M-15																			S83L		S80I	E84V			I529L			aadA5
E472	ECOLI	2018-11-29	Rectal swab	GPED	1193		R	S	S	R	S		S	S	R	S	R	R	S	S	CTX-M-15		TEM-104							OXA-1				aac(6')-Ib-cr_1						S83L	D87N	S80I				L416F	aac(3)-Iia	aac(3)-Iid
E478	ECOLI	2018-11-30	Rectal swab	GPED	46		R	R	R	R	I	R	S	S	S	S	S		S	S	CTX-M-15				TEM-35													qnrS1
E479	KPNEU	2018-11-30	Rectal swab	GPED	1569		R	R	R	R	R	R	S	S	R	S	R		R	R	CTX-M-15					TEM-1B			SHV-194	OXA-1	DHA-1			aac(6')-Ib-cr_1	oqxA6	oqxB14		qnrB1									aac(3)-IIa		aadA1
E477	ECOLI	2018-12-01	Rectal swab	GPED	4981		R	I	R	S	S	R	S	S	S	S	R	R	R	S	CTX-M-15					TEM-1B												qnrS1		S83L	D87N	S80I			S458A
E485	KPNEU	2018-12-01	Rectal swab	NICU	835		R	R	R	S	S	R	S	S	S	S	S		R	I	CTX-M-15					TEM-1B		SHV-33							oqxA3	oqxB12		qnrB1
E480	ECOLI	2018-12-02	Rectal swab	GPED	90		R	S	I	R	S	R	S	S	S	S	R		R	S	CTX-M-159		TEM-126																	S83L	D87N	S80I			S458A				aadA5
E481	ECOLI	2018-12-02	Rectal swab	NICU	130		R	I	R	S	S	R	S	S	S	S	S		S	S	CTX-M-15					TEM-1B														S83L				S57T
E483	ECOLI	2018-12-02	Rectal swab	GPED	442		R	R	R	S	S	R	S	S	S	S	S		S	S	CTX-M-15
E474	ECOLI	2018-12-03	Urine	GPED	38		R	I	R	S	S	R	S	S	S	S	S	S	S	S	CTX-M-159
E475	ECOLI	2018-12-03	Urine	GPED	131	H30	R	S	I	S	S	S	S	S	S	S	R	R	R	S	CTX-M-159																			S83L	D87N	S80I	E84V			I529L			aadA5
E486	KPNEU	2018-12-03	Rectal swab	PICU	133		R	S	I	S	S	R	S	S	S	S	S		S	I	CTX-M-15							SHV-75							oqxA10	oqxB4
E488	ECOLI	2018-12-03	Rectal swab	GPED	8149		R	R	R	S	S	R	S	S	S	S	S		S	S	CTX-M-15																	qnrS1
E489	ECOLI	2018-12-03	Rectal swab	GPED	450		R	S	R	I	S	R	S	S	S	S	R		R	S	CTX-M-15									OXA-1				aac(6')-Ib-cr_1						S83L	D87N	S80I			S458A				aadA5
E503	ECOLI	2018-12-03	Urine	GPED	141		R	R	R	S	S	R	S	S	S	S	S	S	S	S	CTX-M-15
E492	KPNEU	2018-12-04	Rectal swab	PICU	29		R	S	I	I	S	S	S	S	S	S	S		R	R	CTX-M-14					TEM-1B			SHV-187						oqxA10	oqxB25		qnrS1
E496	ECOLI	2018-12-04	Rectal swab	GPED	517		R	R	R	S	S	R	S	S	S	S	S		S	S	CTX-M-15					TEM-1B																							aadA1
E497	ECOLI	2018-12-04	Rectal swab	GPED	131	H42	R	I	R	S	S	R	S	S	R	S	S		R	S	CTX-M-15					TEM-1B														S83L						I529L	aac(3)-IId		aadA5
E498	ECOLI	2018-12-04	Rectal swab	GPED	10		R	R	R	S	S	R	S	S	S	S	S		R	S	CTX-M-15					TEM-1B												qnrS1
E508	KPNEU	2018-12-04	Blood	NICU	405		R	R	R	I	I	R	S	S	R	S	R	S	R	R	CTX-M-15					TEM-1B		SHV-76		OXA-1				aac(6')-Ib-cr_1	oqxA3	oqxB11		qnrB1									aac(3)-IIa
E494	KPNEU	2018-12-05	Rectal swab	PICU	268		R	I	S	R	S		S	S	S	S	S	S	R	S	CTX-M-15							SHV-11							oqxA8	oqxB10		qnrS1											aadA2
E495	ECOLI	2018-12-05	Rectal swab	PICU	131	H41	R	R	S	I	S		S	S	S	S	R	R	R	S	CTX-M-15																			S83L	D87N	S80I	E84V			I529L
E499	KPNEU	2018-12-05	Urine	GPED	48		R	I	I	S	S	R	S	S	S	S	S	S	R	I	CTX-M-15								SHV-172						oqxA6	oqxB10				S83Y
E500	ECOLI	2018-12-06	Rectal swab	PICU	10		R	S	S	S	S		S	S	S	S	S	S	R	S	CTX-M-15																	qnrS1											aadA5
E502	ECOLI	2018-12-06	Rectal swab	GPED	155		R	R	S	R	S		S	S	S	S	R	R	R	I	CTX-M-15					TEM-1B														S83L	D87N	S80I							aadA1
E504	ECOLI	2018-12-06	Rectal swab	GPED	1312		R	S	S	S	S		S	S	S	S	S	S	S	S	CTX-M-15																	qnrS1
CP29	ECOLI	2018-12-14	Rectal swab	PICU	448		R	R	R	R	R	R	R	R	R	S	R	R	R	S	CTX-M-15					TEM-1B					CMY-42	OXA-181		aac(6')-Ib-cr_1				qnrS1		S83L	D87N	S80I			S458A		aac(3)-IId		aadA5
E506	ECOLI	2018-12-19	Urine	GPED	648		R	R	R	R	R	R	S	S	R	I	R	R	R	S	CTX-M-15					TEM-1B				OXA-1				aac(6')-Ib-cr_1						S83L	D87N	S80I			S458A		aac(3)-IIa		aadA5
C14	ECOLI	2018-12-20	Blood	GPED	421		R	R	R	R	S	R	S	S	S	S	S	S	S	S	CTX-M-15																			S83L
C20	ECOLI	2018-12-28	Blood	PICU	10		R	R	R	S	S	R	S	S	S	S	R	R	S	S	CTX-M-15																	qnrS1		S83L
[truncated: 26 more columns]
